# Supplementary material
Source: PubMed Central journal article supplement (PMC3826950)
Supplement: NIHMS525841-supplement-Supplement.pdf [file NIHMS525841-supplement-Supplement.pdf]

## Chromatin marks identify critical cell-types for fine-mapping complex trait variants

Gosia Trynka<sup>1-4\*</sup>, Cynthia Sandor<sup>1-4\*</sup>, Buhm Han<sup>1-4</sup>, Han Xu<sup>5</sup>, Barbara E Stranger<sup>1,4#</sup>, X Shirley Liu<sup>5</sup>, and Soumya Raychaudhuri<sup>1-4,7</sup>

1. Division of Genetics, Brigham and Women's Hospital, Harvard Medical School, Boston, MA, USA.
  2. Division of Rheumatology, Brigham and Women's Hospital, Harvard Medical School, Boston, MA, USA.
  3. Partners Center for Personalized Genetic Medicine, Boston, MA, USA.
  4. Program in Medical and Population Genetics, Broad Institute of Harvard and MIT, Cambridge, MA, USA.
  5. Department of Biostatistics and Computational Biology, Dana-Farber Cancer Institute and Harvard School of Public Health, Boston, Boston, MA, USA
  6. Department of Medicine, University of Chicago, Chicago, Illinois, USA
  7. Faculty of Medical and Human Sciences, University of Manchester, Manchester, UK
- # Current affiliation: Section of Genetic Medicine, Department of Medicine, and Institute for Genomics and Systems Biology, University of Chicago, Chicago, IL, USA.

\*These authors contributed equally to this manuscript

Correspondence:

Soumya Raychaudhuri  
77 Avenue Louis Pasteur  
Harvard New Research Building, Suite 250D  
Boston, Massachusetts 02446  
United States of America  
[soumya@broadinstitute.org](mailto:soumya@broadinstitute.org) 617-525-4484 (tel) 617-525-4488 (fax)

## SUPPLEMENTARY MATERIALS

**Supplementary Figure 1: (A) Phenotypic cell-specificity p-values approximate type I error rate.** We tested 1,000 sets of 510 sampled SNPs where we replaced the 510 GWA catalog SNPs with SNPs sampled from throughout the genome where we matched on the total number of SNP in LD ( $r^2 > 0.8$ ) with them. We then tested marks for statistically significant phenotypic cell-specificity. We observed that in ~1% of instances marks obtained a  $p < 0.01$  significance threshold. **(B) Evaluating the phenotypic cell-specificity of different chromatin marks by including variants in LD with lead SNPs ( $r^2 > 0.8$ ) (black) and by using only the lead SNP of each region (green).** For each mark, we performed up to  $10^6$  permutations of SNPs and phenotypes to calculate the null distribution of phenotypic cell-specificity for comparison to the observed phenotypic cell-specificity. We display the distribution of phenotypic cell-specificity compared to the null (bottom) and the corresponding p-value (top). Yellow, dashed line indicates Bonferroni corrected p-value threshold.

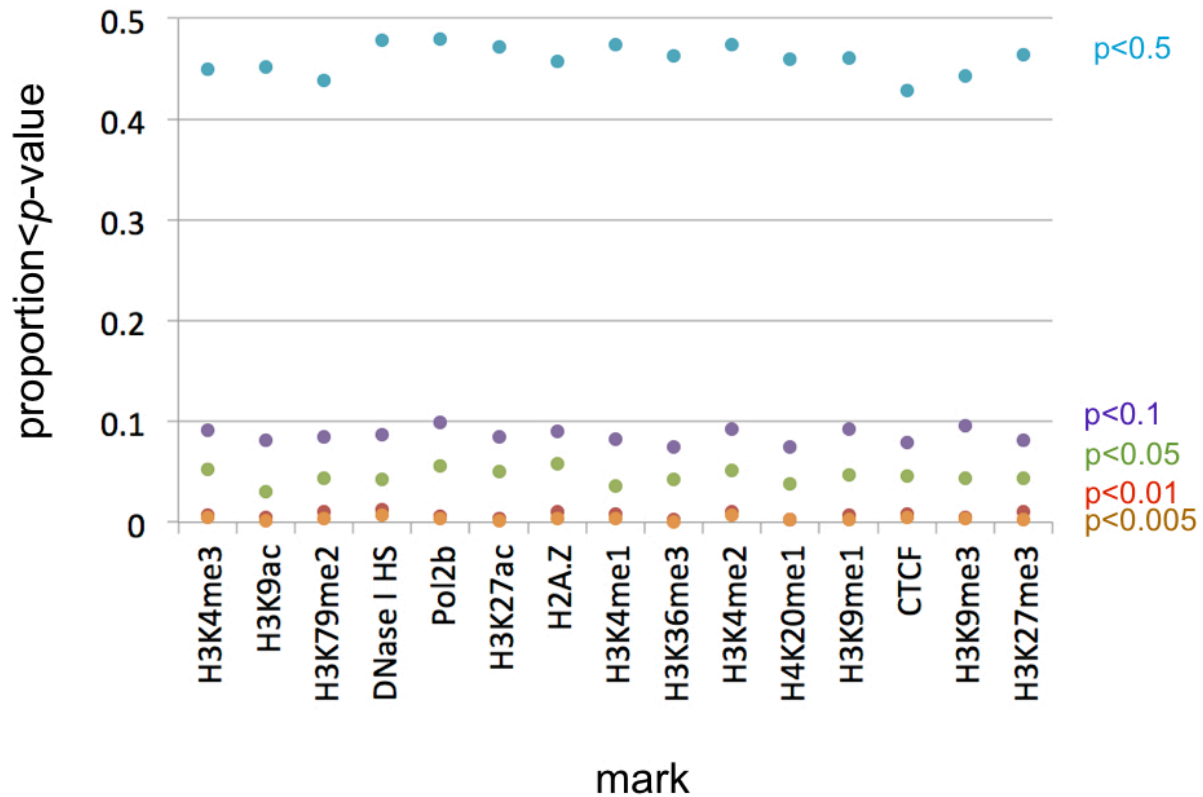

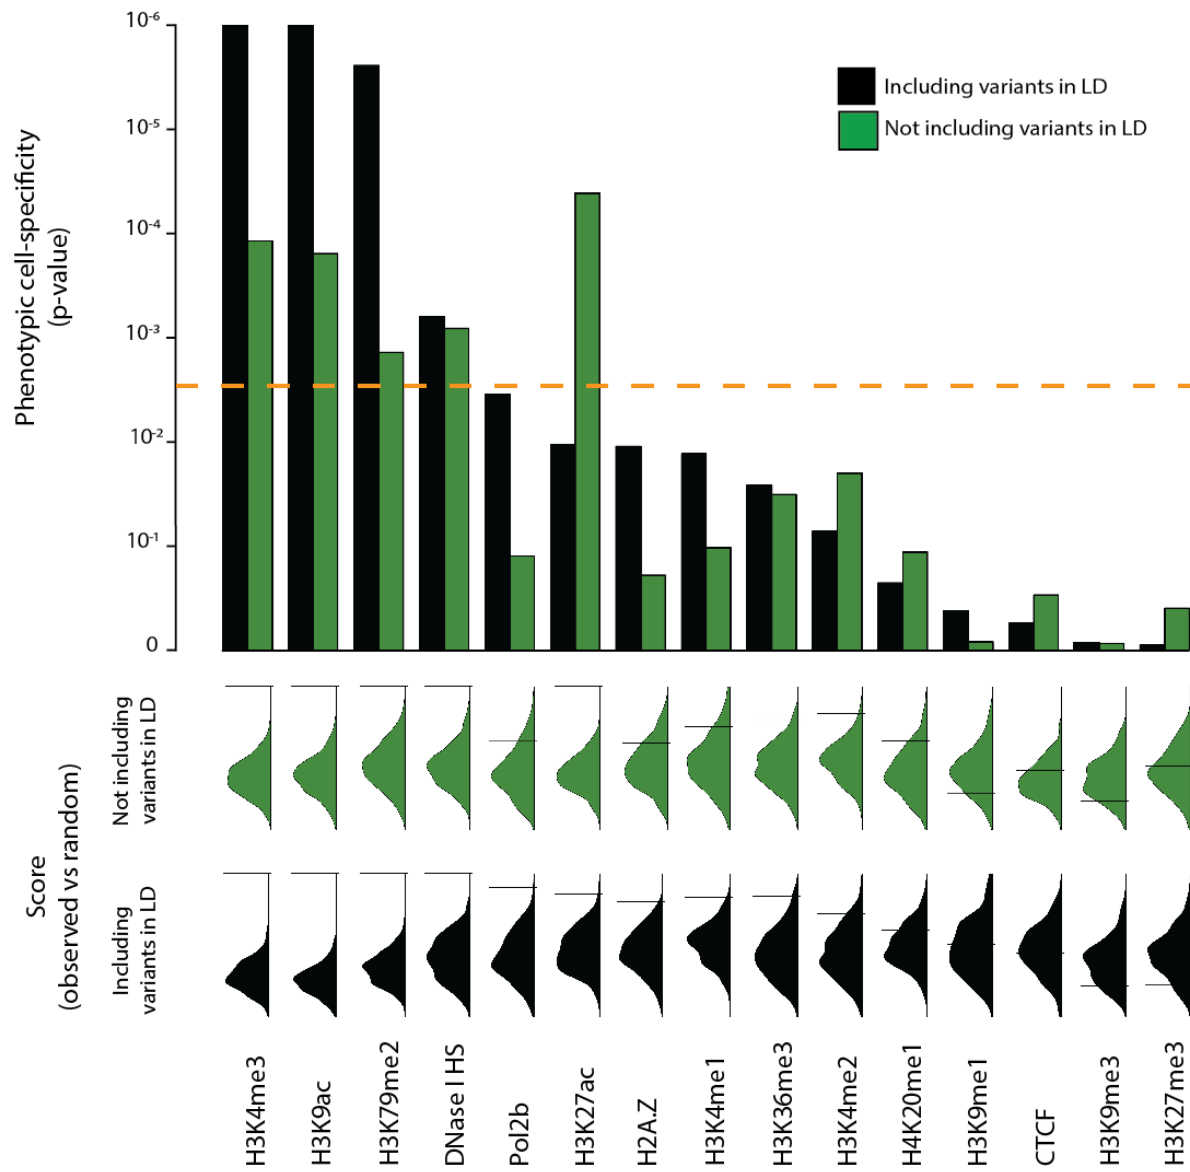



**Figure 3: Evaluation of the conditional phenotypic cell-specificity of five chromatin marks.** For the four most informative chromatin marks (see **Figure 2**) we estimated their significance for phenotypic cell-specificity before and after conditioning on other chromatin marks (listed across the top). To condition on marks we removed peaks overlapping with those of a second mark that we were conditioning on and reassessed phenotypic cell-specificity. We computed the significance based on permutation, using only those cell-types where data for both common chromatin marks was available.

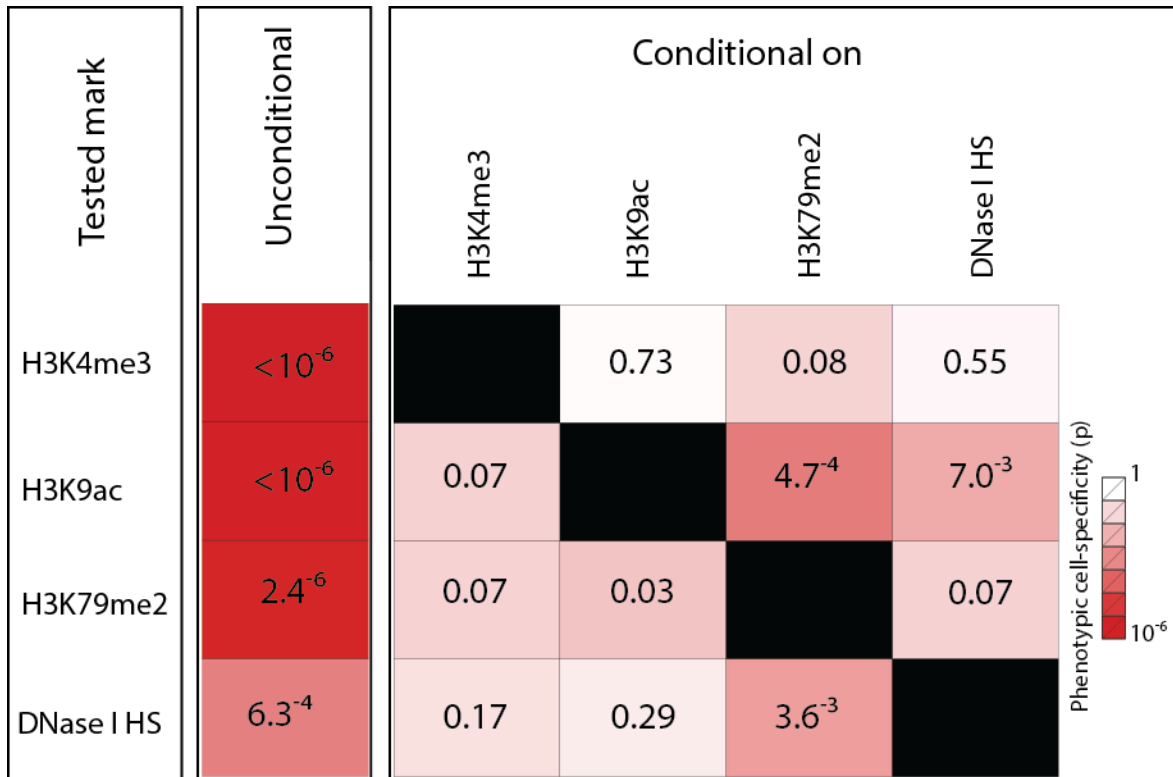

**Supplementary Figure 4: Number of tissues assayed for different ENCODE chromatin marks increases the power to detect phenotypic cell-specificity.** Among the variable number of tissues assayed for chromatin modification, we sampled a data from a fixed number, (3-8), and estimated the phenotypic cell-specificity and its significance with this subset. We reported for each chromatin modification the median p-value and 80% range.

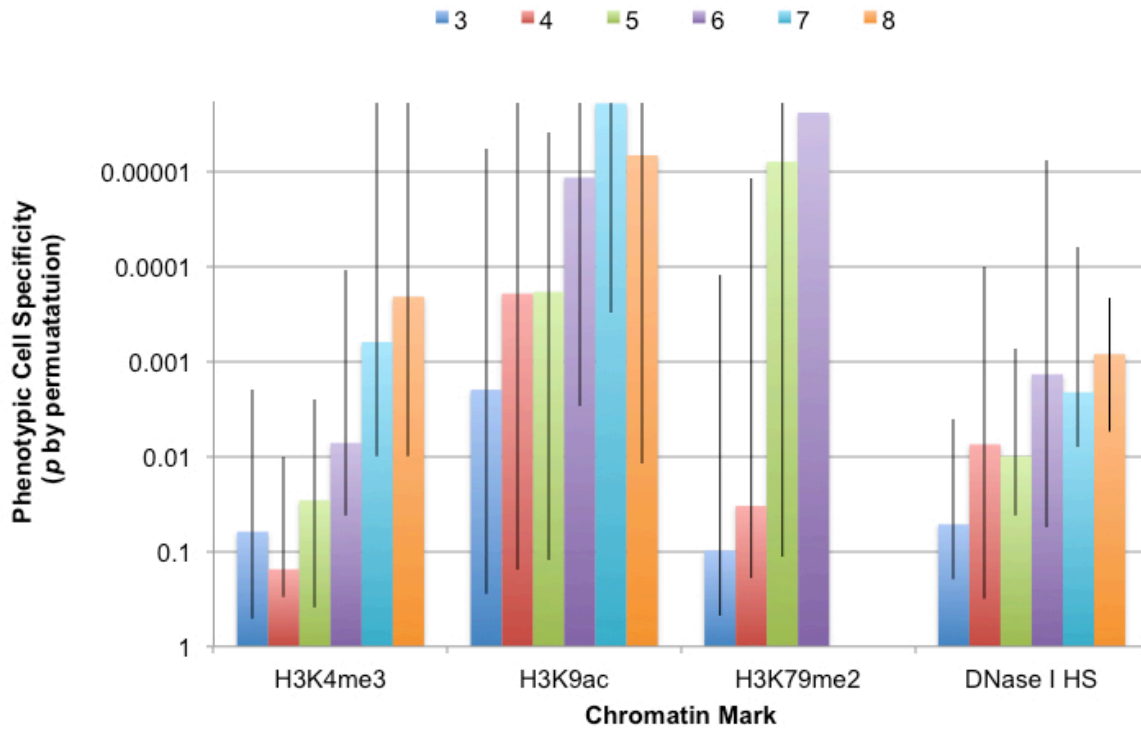

**Supplementary Figure 5: Phenotypic cell-specificity of H3K4me3 is dependent on genomic position of peaks.** In order to assess the dependence of phenotypic cell-specificity on the specific location of ENCODE peaks, we conducted 1000 experiments where we re-assessed phenotypic cell-specificity by moving all epigenetic peaks within the region in LD with each of the 510 associated SNPs ( $r^2 > 0.8$ ). We moved peaks a fixed distance within the LD region that was defined based on a random distribution ( $\pm 10$  kb mean, 2.5 kb standard deviation). This approach maintained local peak structure across assayed cell-types. A histogram of significance p-values of phenotypic cell-specificity for the trials is presented; the red arrow indicates the observed phenotypic cell-specificity in the actual data ( $p < 10^{-6}$ ).

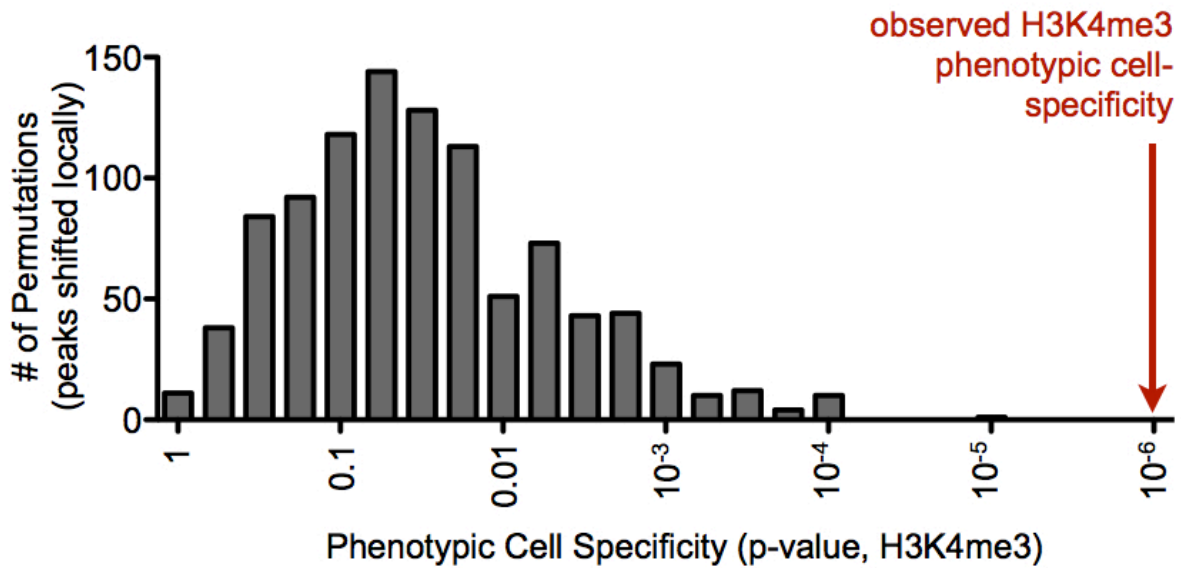

**Supplementary Figure 6: Evaluating the phenotypic cell-specificity of different chromatin marks within TSS regions (TSS +/- 2kbp) and outside the TSS regions.** We estimated the phenotypic cell-specificity with 510 SNPs associated with 31 phenotypes. We used chromatin profiles assayed on 14 ENCODE cell lines by classifying the peaks located within (blue) and outside of TSS regions (red). We then permuted SNPs to calculate significance (see **Methods, Figure 1**). We plot the p-values on the top. We used the null distribution to compute significance scores on the bottom. Scores within TSS are depicted in blue, while scores outside TSS are depicted in red.

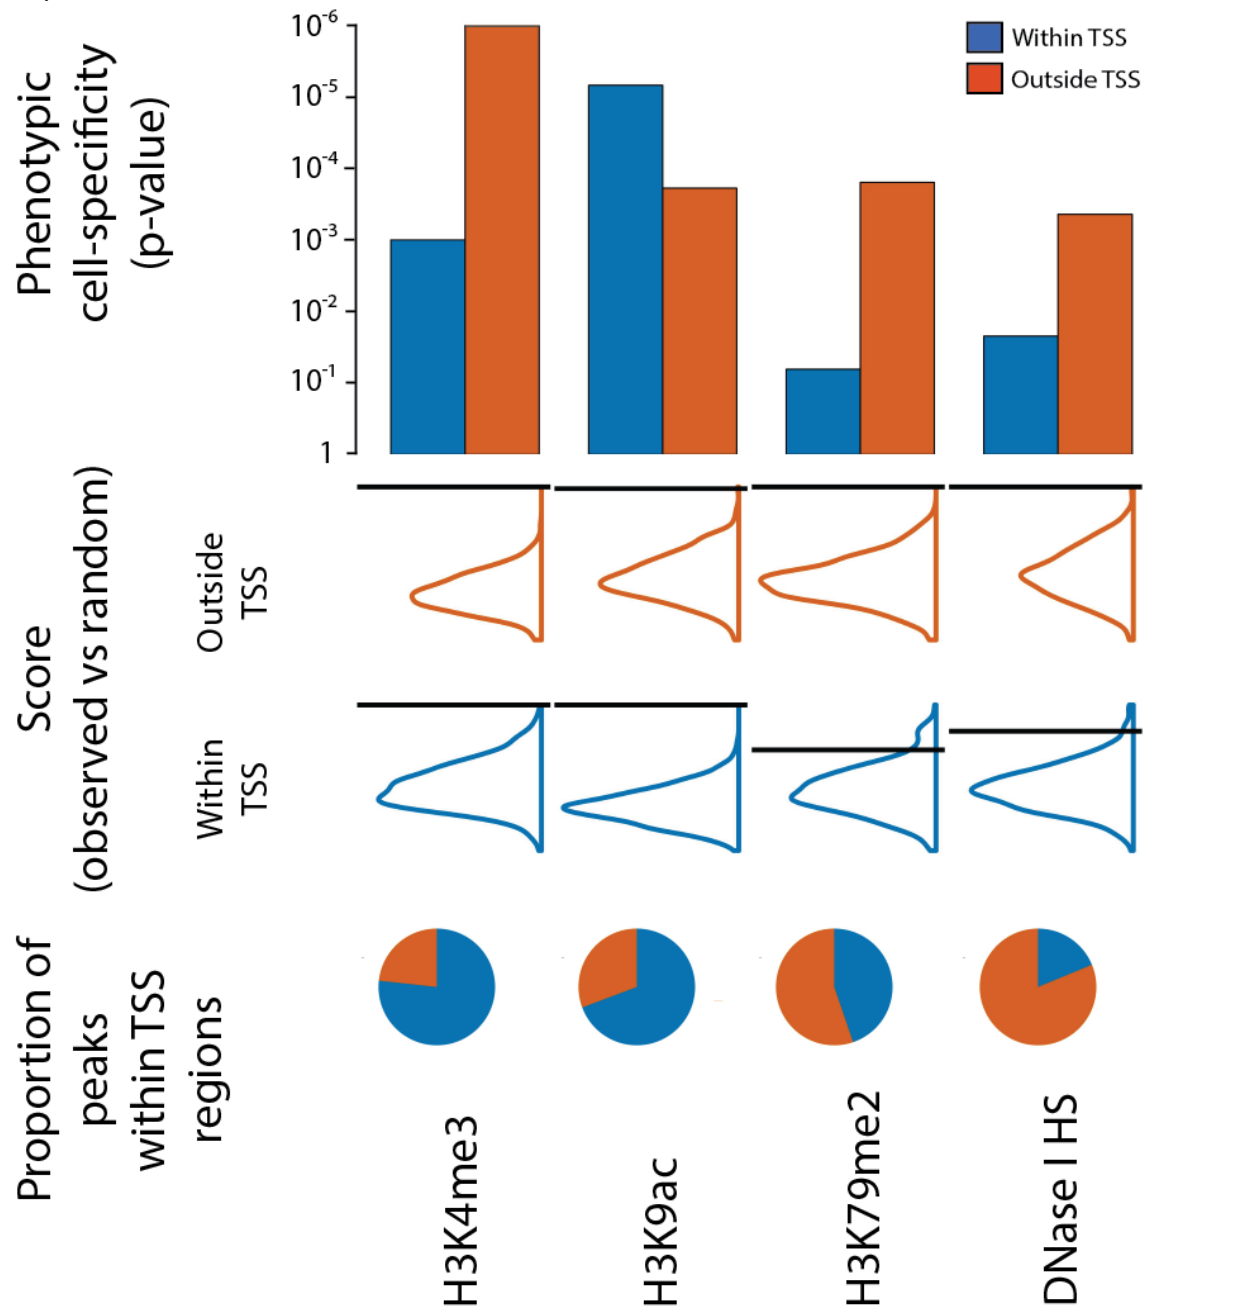



**Supplementary Figure 7: Evaluating the phenotypic cell-specificity for 15 functional annotations derived by clustering nine chromatin modifications into hidden Markov model states** (Ernst *et al. Nature* 2011). We computed the phenotypic cell-specificity of the different functional annotations using the same set of 510 SNPs and 31 different phenotypes. We then permuted SNPs and phenotypes to calculate a null distribution of phenotypic cell-specificity scores ( $n=10^6$ ); those results are plotted on the top panel. We used the null distribution to compute significance scores (bottom panel).

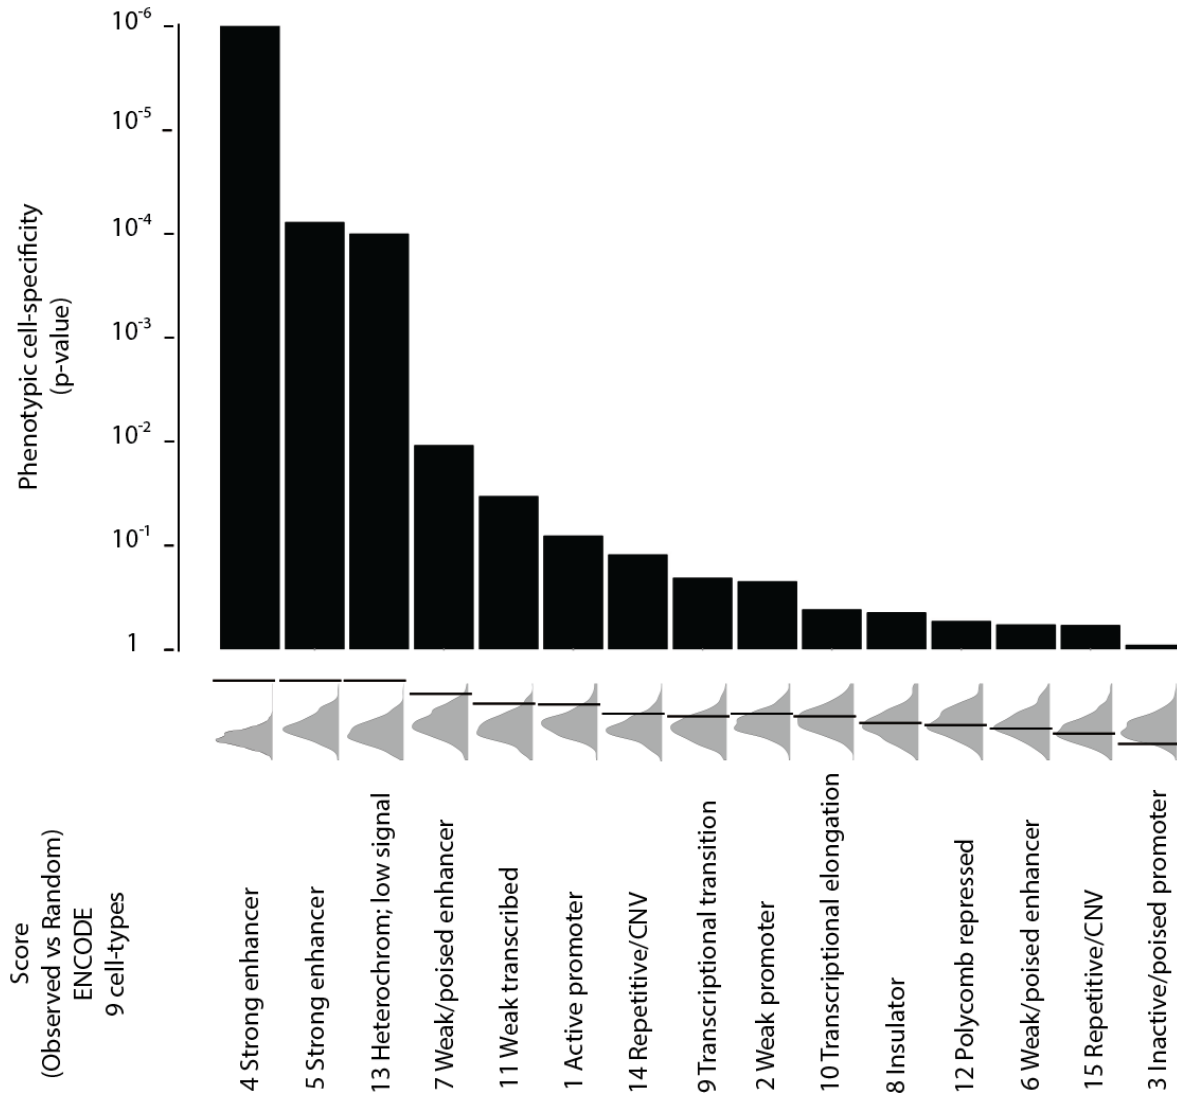

**Supplementary Figure 8: Calculating significance of H3K4me3 overlap with alleles from four complex traits using associated SNPs from the GWAS catalog.** We examined four phenotypes: **(A)** LDL cholesterol plasma concentration, **(B)** rheumatoid arthritis, **(C)** neuropsychiatric disorders (schizophrenia and bipolar disease) and **(D)** type 2 diabetes. For each phenotype we calculated the cell-specific overlap with H3K4me3 histone modification peaks in 34 tissues (listed on the left). In **Figure 3** we conducted a similar analysis, estimating significance from SNPs sampled throughout the genome, matching for the number of marks present locally for each SNP. Here, as a more stringent test, we restricted our matching to SNPs that had been associated with other phenotypes as reported in the GWAS catalog. The bars on the right represent the calculated significance of the overlap for each tissue with alleles from each of the phenotypes using sampled sets from the GWAS catalog. Adjacent to each bar plot, we present correlation coefficients between two tissues based on scores computed from randomly sampled sets of independent loci.

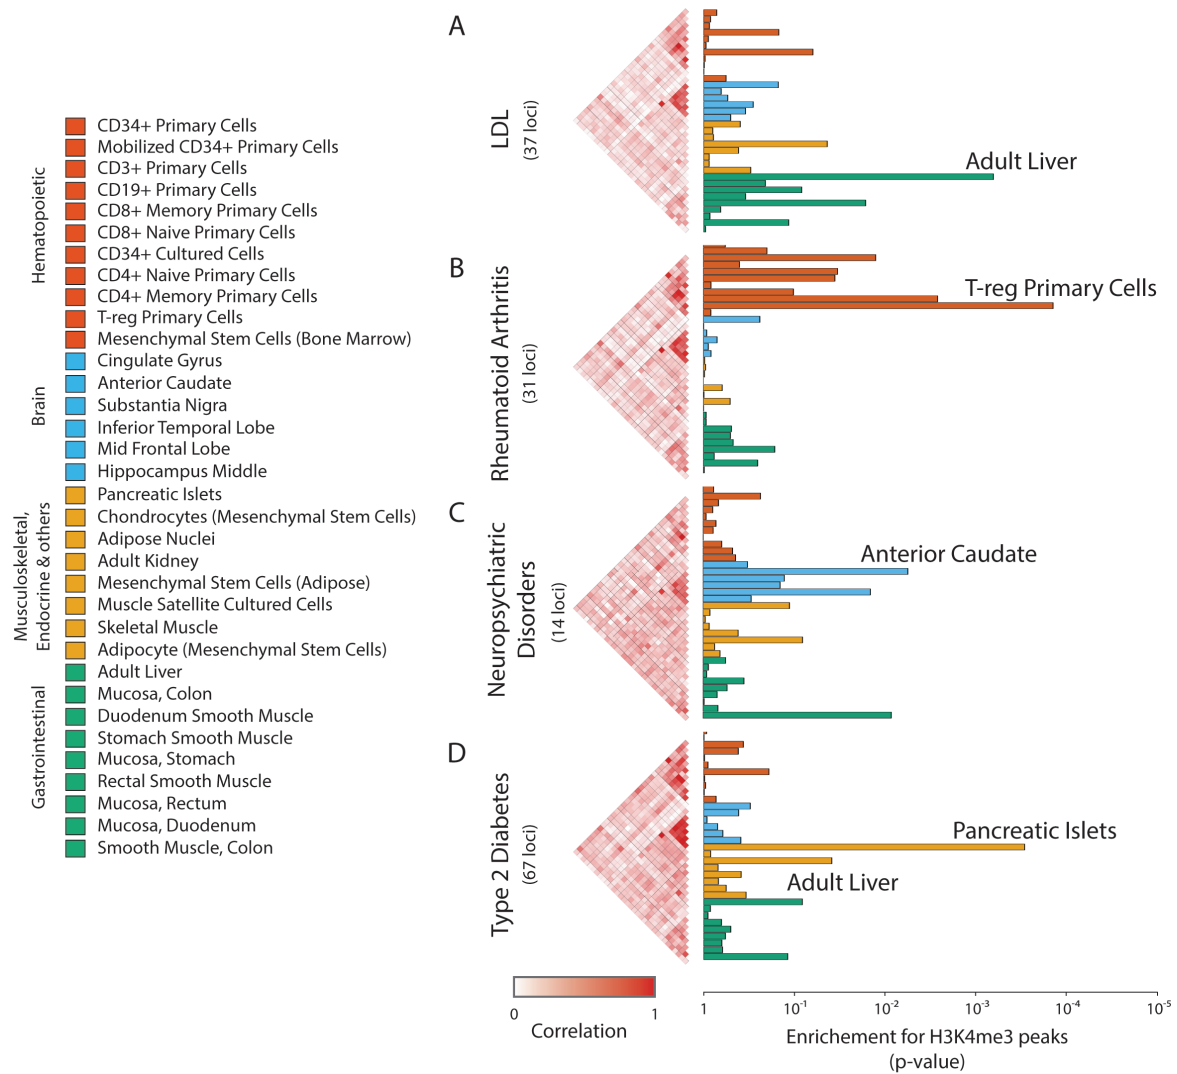

**Supplementary Figure 9: Overlap of SNPs for SLE, BMI, T1D and B-cell specific e-QTL with H3K4me3 marks in specific cell-types.** In addition to LDL, RA, neuropsychiatric disorders and type 2 diabetes, we examined further four, complex phenotypes: **(A)** SLE, **(B)** BMI, **(C)** T1D and **(D)** B-cell specific gene expression QTL. For each phenotype we calculated the cell-specific overlap with H3K4me3 histone modification peaks in 34 tissues (listed on the left). The bars on the right represent the significance of the overlap for each tissue with variants from each of the phenotypes, estimated by sampling sets of SNPs matched so that the total number of peaks overlapping SNPs in LD was the same as in the test set. Adjacent to each bar plots, we present correlation coefficients between two tissues based on scores computed from randomly sampled sets of independent loci.

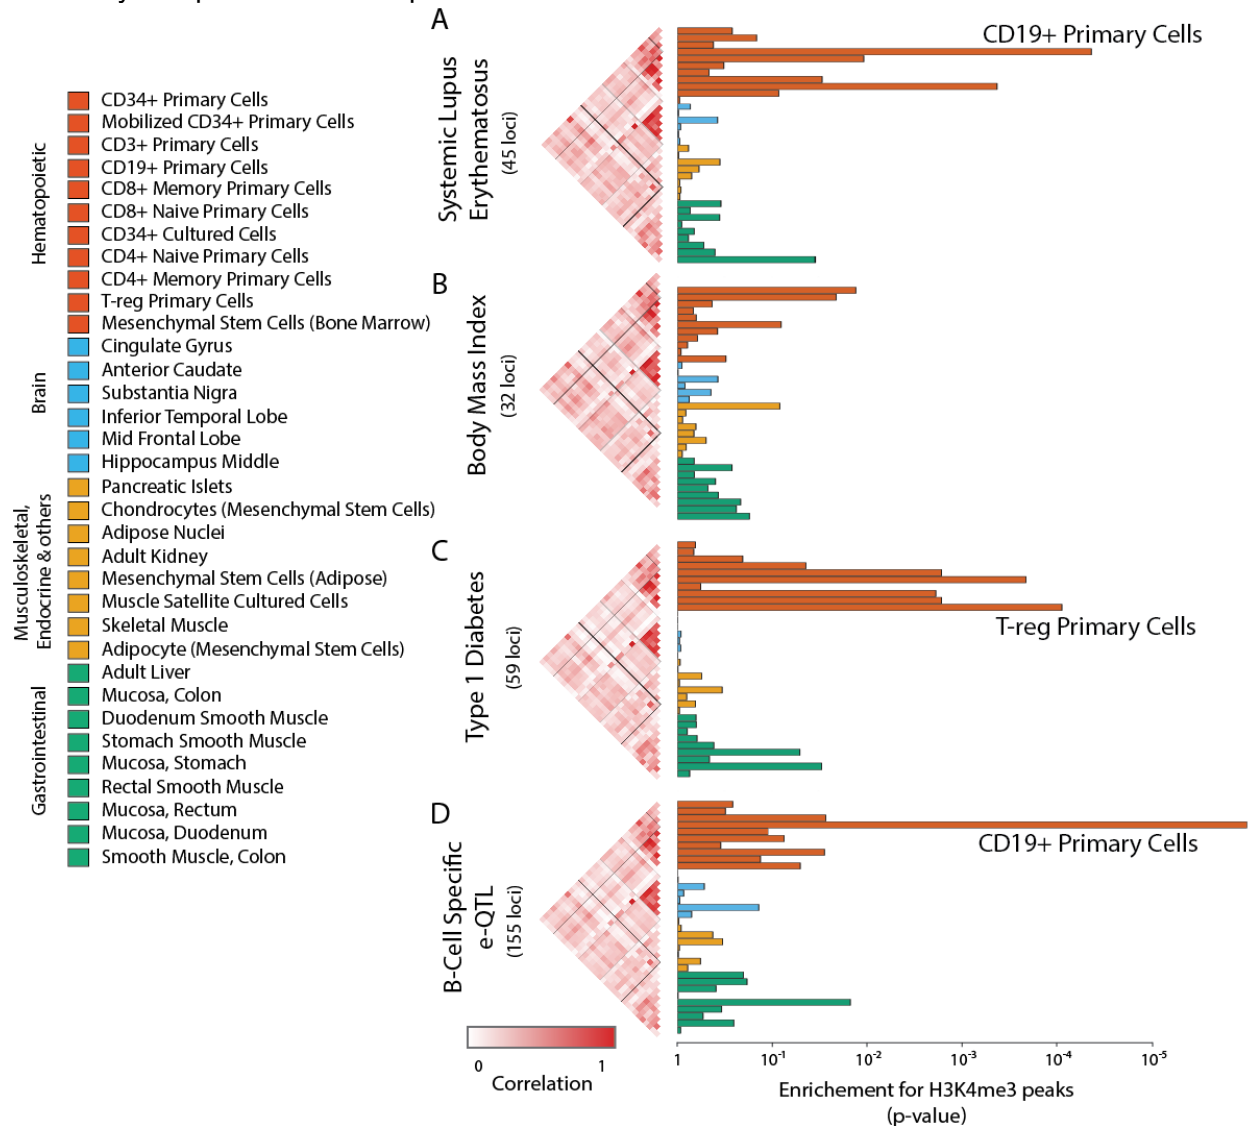

**Supplementary Figure 10: Fine-mapping increases phenotypic-cell specificity signal.** In addition to 31 RA SNPs reported from GWAS studies, we tested the same loci but with recent results from fine-mapping study using dense genotyping platform, Immunochip (Eyre *et al* in review). The bars on the right represent the significance of the overlap for each tissue with variants from GWAS (darker shade) and Immunochip (lighter shade) studies.

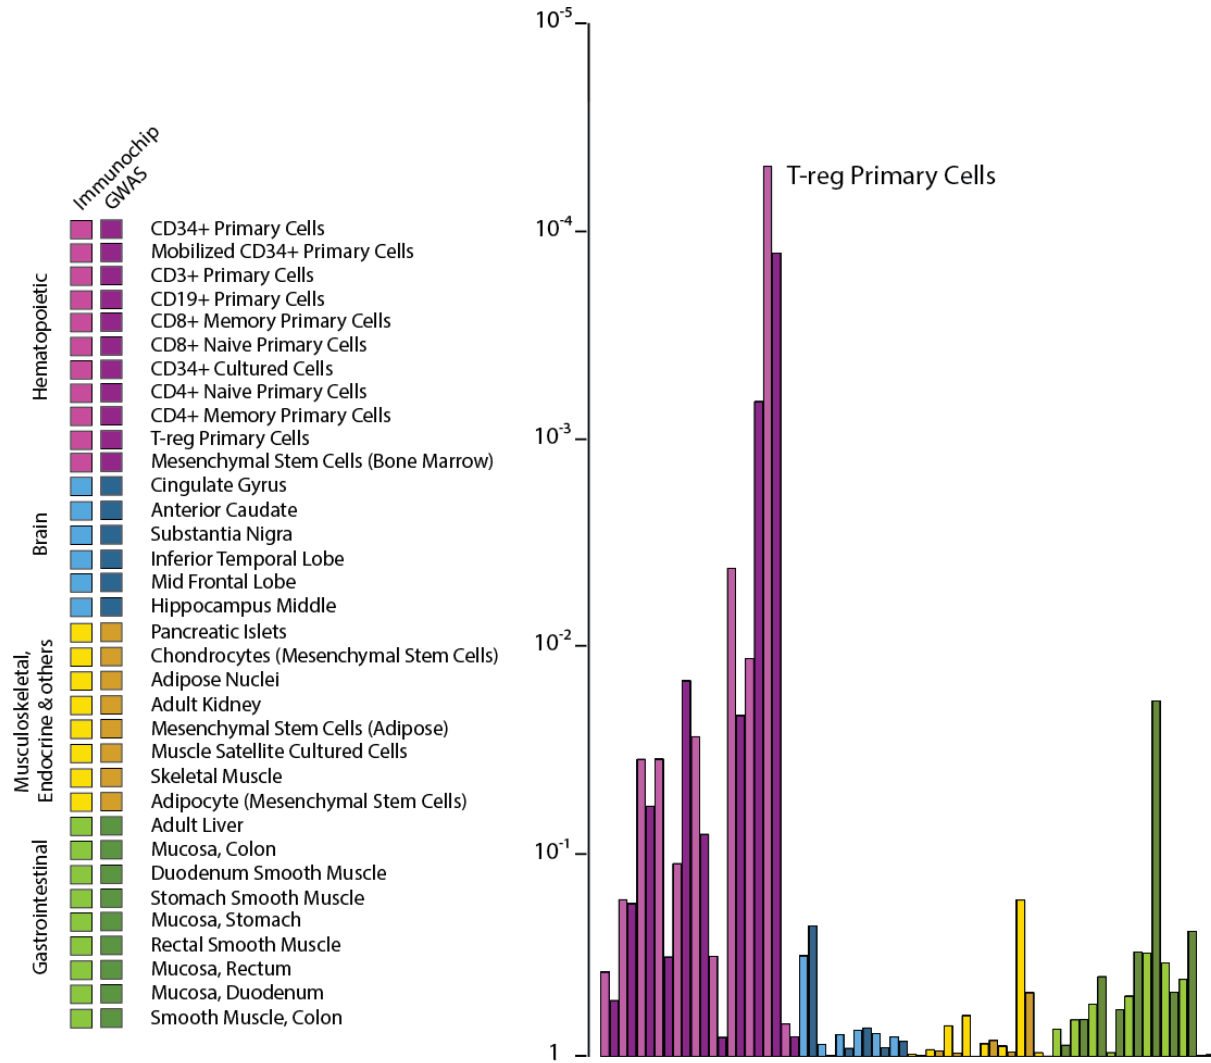





**Supplementary Table 3: Individual SNPs for four phenotypes, and their proximity to cell-type specific peaks.**

**3A Rheumatoid Arthritis**

|                      | Lead SNP   | T-reg Primary Cells |          |           |
|----------------------|------------|---------------------|----------|-----------|
|                      |            | best h/d SNP        | distance | h/d score |
| Rheumatoid arthritis | rs4750316  | rs947474            | 804      | 0.02      |
|                      | rs874040   | rs7441808           | 27       | 0.71      |
|                      | rs548234   | NA                  |          |           |
|                      | rs3218253  | rs3218251           | 166      | 0.21      |
|                      | rs540386   | rs4755453           | 269      | 0.22      |
|                      | rs3890745  | rs60733400          | 652      | 0.01      |
|                      | rs3087243  | rs12990970          | 621      | 0.38      |
|                      | rs934734   | rs268132            | 417      | 0.01      |
|                      | rs1980422  | rs6728441           | 76       | 0.23      |
|                      | rs6920220  | rs6927172           | 121      | 0.29      |
|                      | rs13119723 | rs13140464          | 116      | 0.63      |
|                      | rs10865035 | NA                  |          |           |
|                      | rs13031237 | rs67574266          | 493      | 0.04      |
|                      | rs2104286  | 10:6102726          | 1065     | 0.79      |
|                      | rs3093023  | rs968334            | 368      | 0.07      |
|                      | rs394581   | rs169858            | 1091     | 0.13      |
|                      | rs2476601  | rs2476601           | 1193     | 0.03      |
|                      | rs1678542  | NA                  |          |           |
|                      | rs7574865  | rs10174238          | 571      | 0.15      |
|                      | rs26232    | rs28158             | 13       | 0.76      |
|                      | rs2736340  | rs998683            | 140      | 0.18      |
|                      | rs951005   | rs1928577           | 239      | 0.18      |
|                      | rs12746613 | NA                  |          |           |
|                      | rs4810485  | rs1883832           | 224      | 0.08      |
|                      | rs6859219  | rs10065637          | 5        | 0.80      |
|                      | rs10488631 | NA                  |          |           |
|                      | rs3761847  | rs11794516          | 17       | 0.41      |
|                      | rs2812378  | NA                  |          |           |
|                      | rs11586238 | NA                  |          |           |
|                      | rs10892279 | 11:118660641        | 184      | 0.06      |
| rs10919563           | rs6683595  | 47                  | 0.99     |           |

**3B LDL cholesterol**

|  | Lead SNP   | Adult Liver  |          |           |
|--|------------|--------------|----------|-----------|
|  |            | best h/d SNP | distance | h/d score |
|  | rs12027135 | rs9438904    | 127      | 0.13      |
|  | rs7225700  | rs11079772   | 8        | 0.06      |
|  | rs2000999  | rs3794695    | 298      | 0.75      |

|                                             |            |             |      |      |
|---------------------------------------------|------------|-------------|------|------|
| <b>LDL cholesterol plasma concentration</b> | rs3177928  | NA          |      |      |
|                                             | rs12916    | NA          |      |      |
|                                             | rs649129   | NA          |      |      |
|                                             | rs174583   | 11:61596322 | 1    | 1.00 |
|                                             | rs1564348  | NA          |      |      |
|                                             | rs3757354  | rs760633    | 654  | 0.15 |
|                                             | rs2902941  | NA          |      |      |
|                                             | rs1129555  | rs2419604   | 766  | 0.07 |
|                                             | rs2126259  | rs2126259   | 186  | 0.99 |
|                                             | rs11065987 | NA          |      |      |
|                                             | rs1800562  | rs115740542 | 1414 | 0.13 |
|                                             | rs2332328  | NA          |      |      |
|                                             | rs3850634  | rs631106    | 56   | 0.01 |
|                                             | rs11153594 | rs1999929   | 355  | 0.07 |
|                                             | rs1367117  | 2:21266774  | 1406 | 0.20 |
|                                             | rs964184   | NA          |      |      |
|                                             | rs4299376  | NA          |      |      |
|                                             | rs6882076  | NA          |      |      |
|                                             | rs10401969 | 19:19432290 | 1161 | 0.00 |
|                                             | rs2479409  | rs2479409   | 900  | 0.45 |
|                                             | rs11220462 | NA          |      |      |
|                                             | rs1169288  | rs1169288   | 143  | 0.43 |
|                                             | rs6511720  | 19:11201987 | 292  | 0.17 |
|                                             | rs247616   | NA          |      |      |
|                                             | rs1030431  | NA          |      |      |
|                                             | rs217386   | rs217371    | 262  | 0.01 |
|                                             | rs629301   | rs12740374  | 87   | 0.20 |
|                                             | rs514230   | rs508293    | 2    | 1.00 |
| rs4420638                                   | rs56131196 | 17          | 1.00 |      |
| rs12670798                                  | rs7809080  | 132         | 1.00 |      |
| rs909802                                    | rs6072336  | 185         | 0.15 |      |
| rs11136341                                  | rs11787335 | 41          | 0.10 |      |
| rs2807834                                   | NA         |             |      |      |
| rs2954022                                   | rs6999569  | 139         | 0.81 |      |

### 3C Neuropsychiatric Diseases

|                | <b>Lead SNP</b> | <b>Anterior Caudate</b> |                 |                  |
|----------------|-----------------|-------------------------|-----------------|------------------|
|                |                 | <b>best h/d SNP</b>     | <b>distance</b> | <b>h/d score</b> |
| <b>iseases</b> | rs12576775      | NA                      |                 |                  |
|                | rs10896135      | rs7570                  | 699             | 0.03             |
|                | rs17512836      | NA                      |                 |                  |
|                | rs7296288       | rs7296288               | 2377            | 0.24             |
|                | rs12807809      | NA                      |                 |                  |



|                           |            |            |      |      |
|---------------------------|------------|------------|------|------|
| <b>Neuropsychiatric D</b> | rs7004633  | NA         |      |      |
|                           | rs1625579  | 1:98513675 | 1327 | 0.08 |
|                           | rs17662626 | NA         |      |      |
|                           | rs4765913  | NA         |      |      |
|                           | rs7914558  | rs2275271  | 124  | 0.05 |
|                           | rs10503253 | NA         |      |      |
|                           | rs11191580 | rs79780963 | 35   | 0.30 |
|                           | rs10994397 | rs1938540  | 4    | 0.97 |
|                           | rs12966547 | rs4128242  | 252  | 0.69 |

### 3D Type 2 Diabetes

| Lead SNP   | Pancreatic Islets |          |           | Adult Liver  |          |           |
|------------|-------------------|----------|-----------|--------------|----------|-----------|
|            | best h/d SNP      | distance | h/d score | best h/d SNP | distance | h/d score |
| rs2028299  | NA                |          |           | rs12594808   | 195      | 0.03      |
| rs13292136 | NA                |          |           | NA           |          |           |
| rs12970134 | NA                |          |           | NA           |          |           |
| rs459193   | rs30351           | 1977     | 0.05      | NA           |          |           |
| rs4689388  | 4:6275294         | 16       | 0.04      | rs6830765    | 15       | 0.18      |
| rs12454712 | NA                |          |           | NA           |          |           |
| rs2334499  | NA                |          |           | rs4417225    | 163      | 1.00      |
| rs4402960  | rs6769511         | 24       | 1.00      | NA           |          |           |
| rs1387153  | rs10765572        | 12       | 1.00      | rs10765572   | 355      | 0.03      |
| rs1802295  | NA                |          |           | NA           |          |           |
| rs11708067 | NA                |          |           | NA           |          |           |
| rs163184   | NA                |          |           | NA           |          |           |
| rs7578326  | rs7578326         | 1076     | 0.17      | 2:227025121  | 114      | 0.88      |
| rs780094   | NA                |          |           | rs1260326    | 140      | 1.00      |
| rs5215     | rs1002226         | 1288     | 0.02      | rs10832778   | 112      | 0.39      |
| rs7961581  | NA                |          |           | NA           |          |           |
| rs1531343  | NA                |          |           | NA           |          |           |
| rs972283   | NA                |          |           | NA           |          |           |
| rs8090011  | NA                |          |           | NA           |          |           |
| rs11634397 | rs1357336         | 85       | 0.53      | rs2866367    | 587      | 0.13      |
| rs4457053  | rs7732130         | 5        | 1.00      | NA           |          |           |
| rs231362   | NA                |          |           | NA           |          |           |
| rs3794991  | NA                |          |           | rs73002956   | 432      | 0.07      |
| rs8108269  | rs11670462        | 671      | 0.01      | NA           |          |           |
| rs516946   | NA                |          |           | NA           |          |           |
| rs7041847  | rs10814915        | 84       | 0.94      | rs10814917   | 2021     | 0.06      |
| rs831571   | NA                |          |           | NA           |          |           |
| rs10946398 | NA                |          |           | NA           |          |           |
| rs13266634 | rs35859536        | 2428     | 1.00      | NA           |          |           |
| rs6017317  | rs12480669        | 1409     | 0.04      | rs6031507    | 1986     | 0.19      |

| Type 2 Diabetes |            |      |      |            |      |      |
|-----------------|------------|------|------|------------|------|------|
| rs10923931      | NA         |      |      | rs2934381  | 447  | 0.06 |
| rs17584499      | NA         |      |      | NA         |      |      |
| rs896854        | rs896854   | 46   | 0.04 | rs1320164  | 14   | 0.33 |
| rs243021        | rs243018   | 297  | 0.24 | NA         |      |      |
| rs7901695       | rs7903146  | 345  | 0.07 | NA         |      |      |
| rs12571751      | NA         |      |      | rs703976   | 340  | 0.04 |
| rs9470794       | 6:38078250 | 12   | 0.28 | 6:38131851 | 4    | 0.84 |
| rs16861329      | NA         |      |      | NA         |      |      |
| rs2191349       | rs10228796 | 12   | 0.47 | rs7798124  | 24   | 0.54 |
| rs8050136       | rs28567725 | 146  | 0.53 | rs8047587  | 2207 | 0.02 |
| rs7178572       | rs62007299 | 292  | 0.09 | rs34591043 | 200  | 0.18 |
| rs864745        | rs849142   | 1191 | 0.05 | rs1635852  | 128  | 0.28 |
| rs3786897       | NA         |      |      | rs3786898  | 2    | 1.00 |
| rs2796441       | rs2796441  | 161  | 0.93 | NA         |      |      |
| rs5015480       | NA         |      |      | rs10882101 | 23   | 0.82 |
| rs7202877       | rs60879082 | 938  | 0.01 | rs73605139 | 507  | 0.05 |
| rs340874        | rs340874   | 1301 | 0.06 | rs340874   | 2456 | 0.06 |
| rs10811661      | NA         |      |      | NA         |      |      |
| rs1552224       | rs1552224  | 98   | 0.01 | rs1552224  | 48   | 0.07 |
| rs7612463       | 3:23243837 | 307  | 0.03 | 3:23243837 | 483  | 0.14 |
| rs4523957       | rs4523957  | 1333 | 0.05 | 17:2213409 | 68   | 0.73 |
| rs8042680       | rs6496747  | 253  | 0.17 | rs6496747  | 1091 | 0.09 |
| rs7957197       | rs12425790 | 1442 | 0.07 | rs12425790 | 1639 | 0.15 |
| rs7593730       | NA         |      |      | NA         |      |      |
| rs1535500       | NA         |      |      | rs10947804 | 964  | 0.00 |
| rs4607517       | rs2908289  | 36   | 0.12 | rs1004558  | 423  | 0.18 |
| rs7172432       | rs7163757  | 54   | 0.28 | NA         |      |      |
| rs4607103       | NA         |      |      | NA         |      |      |
| rs1359790       | rs11616380 | 18   | 0.16 | rs11616380 | 87   | 0.03 |
| rs10842994      | rs10842991 | 2    | 1.00 | NA         |      |      |
| rs6467136       | rs4551267  | 1562 | 0.25 | rs4551267  | 1932 | 0.18 |
| rs1801282       | rs17036160 | 774  | 0.01 | rs7649970  | 181  | 0.12 |
| rs3923113       | NA         |      |      | NA         |      |      |
| rs7578597       | rs74382177 | 26   | 0.62 | rs76282560 | 623  | 0.02 |
| rs6815464       | rs55875205 | 80   | 0.03 | rs73069965 | 74   | 0.03 |
| rs11063069      | rs4238013  | 1941 | 0.11 | NA         |      |      |
| rs12779790      | NA         |      |      | NA         |      |      |

**Supplementary Table 4:** Significance (p) of the overlap for each tissue with alleles from each of the phenotypes.

|                               |          | Chondrocytes from Bone Marrow Derived Mesenchymal Stem Cell Cultured Cells | Adipose Derived Mesenchymal Stem Cell | Mesenchymal Stem Cell Derived Adipocyte Cultured Cells | CD34 Primary Cells | Skeletal Muscle | Brain Cingulate Gyrus | Mobilized CD34 Primary Cells | Colon Smooth Muscle | Rectal Mucosa | Adipose Nuclei | CD19 Primary Cells | Adult Kidney | Bone Marrow Derived Mesenchymal Stem Cell Cultured Cells | Brain Anterior Caudate | Pancreatic Islets | Brain Substantia Nigra | Fetal Heart | Brain Inferior Temporal Lobe | Treg Primary Cells | Colonic Mucosa | CD4 Naive Primary Cells | Stomach Smooth Muscle | Brain Mid Frontal Lobe | Th17 Primary Cells | Muscle Satellite Cultured Cells | Duodenum Mucosa | CD3 Primary Cells | Rectal Smooth Muscle | Fetal Lung | CD34 Cultured Cells | CD8 Naive Primary Cells | Brain Hippocampus Middle | CD4 Memory Primary Cells | Fetal Brain | Adult Liver | CD8 Memory Primary Cells | Stomach Mucosa | Duodenum Smooth Muscle |      |      |      |      |
|-------------------------------|----------|----------------------------------------------------------------------------|---------------------------------------|--------------------------------------------------------|--------------------|-----------------|-----------------------|------------------------------|---------------------|---------------|----------------|--------------------|--------------|----------------------------------------------------------|------------------------|-------------------|------------------------|-------------|------------------------------|--------------------|----------------|-------------------------|-----------------------|------------------------|--------------------|---------------------------------|-----------------|-------------------|----------------------|------------|---------------------|-------------------------|--------------------------|--------------------------|-------------|-------------|--------------------------|----------------|------------------------|------|------|------|------|
| Serum Low Density Lipoprotein | H3K4me3  | 0.84                                                                       | 0.90                                  | 0.53                                                   | 0.30               | 0.66            | 0.84                  | 0.23                         | 0.74                | 0.96          | 0.85           | 0.84               | 0.035        | 0.023                                                    | 0.66                   | 0.75              | 0.64                   | 0.49        | NA                           | 0.20               | 0.97           | 0.19                    | 0.95                  | 0.29                   | 0.53               | 0.91                            | 0.077           | 0.91              | 0.37                 | NA         | 0.035               | 0.94                    | 0.98                     | NA                       | NA          | 0.90        | 0.011                    | 0.90           | 0.20                   |      |      |      |      |
|                               | H3K27me3 | 0.90                                                                       | 0.60                                  | 0.36                                                   | 0.30               | 0.038           | NA                    | 0.32                         | 0.012               | 0.48          | 0.96           | NA                 | NA           | 0.98                                                     | 0.36                   | 0.79              | 0.88                   | 0.13        | 0.56                         | 0.038              | 0.30           | 0.75                    | 0.35                  | NA                     | NA                 | 0.83                            | 0.25            | 0.011             | 0.040                | 0.27       | NA                  | 0.039                   | 0.54                     | 0.43                     | NA          | 1.00        | 0.85                     | 0.90           | 0.64                   | 0.20 |      |      |      |
|                               | H3K36me3 | 0.55                                                                       | 0.24                                  | 0.72                                                   | 0.36               | 0.60            | 0.55                  | 0.94                         | 0.31                | 0.47          | 0.84           | 0.87               | 0.086        | 0.20                                                     | 0.67                   | 0.069             | 0.64                   | 0.29        | 0.37                         | 0.66               | 0.72           | 0.88                    | 0.78                  | 0.73                   | NA                 | 0.44                            | 0.0085          | 0.13              | 0.040                | 0.81       | 0.87                | 0.49                    | 0.17                     | 0.051                    | NA          | 0.0050      | 0.72                     | 0.41           | 0.38                   | 0.64 | 0.20 |      |      |
|                               | H3K4me1  | 0.94                                                                       | 0.91                                  | 0.96                                                   | 0.36               | NA              | 0.20                  | 0.064                        | 0.22                | 0.30          | 0.27           | 0.84               | NA           | 0.20                                                     | 0.19                   | 0.65              | 0.77                   | NA          | 0.19                         | 0.76               | NA             | 0.075                   | 0.92                  | 0.48                   | 0.20               | NA                              | 0.76            | 0.024             | 0.64                 | 0.79       | 0.32                | 0.11                    | 0.019                    | 0.27                     | 0.023       | 0.84        | 0.21                     | 0.17           | 0.41                   | 0.64 | 0.20 |      |      |
|                               | H3K9ac   | 0.83                                                                       | 1.0                                   | 0.39                                                   | 0.96               | NA              | 0.94                  | 0.56                         | NA                  | 0.18          | 0.10           | 0.0025             | NA           | 0.33                                                     | 0.94                   | 0.089             | 0.55                   | 0.42        | NA                           | 0.76               | NA             | 0.20                    | NA                    | 0.50                   | 0.89               | 0.97                            | 0.09            | 0.75              | 0.28                 | 0.79       | NA                  | 0.23                    | NA                       | 0.038                    | 0.028       | 0.66        | 0.21                     | 0.17           | 0.41                   | 0.64 | 0.20 |      |      |
|                               | H3K9me3  | 0.48                                                                       | 0.34                                  | 0.057                                                  | 0.36               | NA              | 0.093                 | 0.69                         | 0.99                | 0.26          | 0.48           | 0.77               | NA           | 0.63                                                     | 0.35                   | NA                | 0.42                   | 0.0094      | 0.78                         | 0.98               | 0.79           | 0.68                    | 0.47                  | 0.35                   | 0.34               | 0.95                            | 0.91            | 0.50              | 0.83                 | 0.57       | 0.08                | 0.92                    | NA                       | NA                       | 0.86        | 0.66        | 0.0018                   | 0.21           | 0.17                   | 0.41 | 0.64 | 0.20 |      |
| Neuropsychiatric Diseases     | H3K4me3  | 0.90                                                                       | 0.36                                  | 0.63                                                   | 0.63               | 0.63            | 0.72                  | 0.14                         | 0.026               | 0.95          | 0.87           | 0.47               | 0.86         | 0.54                                                     | 0.0076                 | 0.18              | 0.22                   | NA          | 0.36                         | 0.33               | 0.63           | 0.97                    | 0.41                  | 0.044                  | NA                 | 0.13                            | 0.63            | 0.38              | 0.63                 | 0.67       | 0.46                | 0.31                    | 0.29                     | NA                       | 0.58        | 0.80        | 0.52                     | 0.18           | 0.82                   | 0.18 | 0.82 | 0.18 | 0.82 |
|                               | H3K27me3 | 0.69                                                                       | 0.99                                  | 0.99                                                   | 0.63               | 0.81            | 0.44                  | 0.44                         | 0.088               | 0.54          | 0.47           | NA                 | NA           | 0.24                                                     | 0.88                   | 0.76              | 0.17                   | 7.0E-05     | 0.84                         | 0.69               | 0.48           | 0.27                    | 0.10                  | NA                     | NA                 | 0.054                           | 0.38            | 0.93              | NA                   | 0.23       | 0.59                | 0.39                    | 0.52                     | 0.91                     | 0.49        | 0.91        | 0.49                     | 0.80           | 0.57                   | 0.52 | 0.18 | 0.82 |      |
|                               | H3K36me3 | 0.87                                                                       | 0.78                                  | 0.074                                                  | 0.99               | 0.82            | 0.33                  | 0.22                         | 0.054               | 0.73          | 0.18           | 0.18               | 0.54         | 0.16                                                     | 0.52                   | 0.15              | 0.84                   | 0.12        | 0.31                         | 0.63               | 0.82           | 0.49                    | 0.91                  | 0.40                   | NA                 | 0.90                            | 0.79            | 0.68              | 0.31                 | 0.68       | 0.23                | 0.63                    | 0.46                     | 0.60                     | 0.15        | 0.89        | 0.89                     | 0.68           | 0.87                   | 0.18 | 0.82 | 0.18 | 0.82 |
|                               | H3K4me1  | 0.50                                                                       | 0.08                                  | 0.029                                                  | 0.074              | NA              | 0.79                  | 0.55                         | 0.29                | 0.58          | 0.028          | 0.54               | 0.43         | 0.54                                                     | 0.43                   | 0.35              | 0.84                   | NA          | 0.71                         | 0.69               | 0.15           | 0.82                    | 0.91                  | 0.31                   | 0.40               | NA                              | 0.88            | 0.68              | 0.12                 | 0.31       | 0.51                | 0.59                    | 0.46                     | 0.60                     | 0.30        | 0.97        | 0.15                     | 0.89           | 0.89                   | 0.68 | 0.87 | 0.18 | 0.82 |
|                               | H3K9ac   | 0.69                                                                       | 0.45                                  | 0.11                                                   | 0.029              | NA              | 0.075                 | 0.55                         | 0.44                | 1.0           | 0.88           | 0.96               | NA           | 0.95                                                     | 0.48                   | 0.62              | 0.52                   | NA          | NA                           | 0.89               | NA             | 0.90                    | 0.13                  | 0.07                   | 0.07               | 0.44                            | 0.94            | 0.95              | 0.95                 | 0.12       | 0.51                | 0.83                    | 0.60                     | 0.30                     | 0.83        | 0.97        | 0.15                     | 0.89           | 0.89                   | 0.68 | 0.87 | 0.18 | 0.82 |
|                               | H3K9me3  | 0.59                                                                       | 0.64                                  | 0.64                                                   | 0.63               | NA              | 0.62                  | 0.055                        | 0.68                | 0.058         | 0.68           | 0.052              | NA           | 0.10                                                     | 0.94                   | 0.26              | 0.17                   | 0.30        | NA                           | 0.14               | 0.83           | 0.83                    | 0.87                  | 1.00                   | 0.13               | 0.21                            | 0.56            | 0.62              | 0.85                 | 0.56       | 1.0                 | 0.95                    | 0.92                     | 0.46                     | 0.83        | 0.97        | 0.15                     | 0.89           | 0.89                   | 0.68 | 0.87 | 0.18 | 0.82 |

| Type 2 Diabetes |        | Rheumatoid Arthritis |       |
|-----------------|--------|----------------------|-------|
| H3K9me3         | 0.46   | 0.32                 | 0.031 |
| H3K4me1         | 0.14   | 0.73                 | 0.37  |
| H3K36me3        | 0.031  | 0.47                 | 0.30  |
| H3K27me3        | NA     | NA                   | NA    |
| H3K4me3         | 0.44   | 0.99                 | 0.13  |
| H3K9ac          | 0.065  | 0.67                 | 0.91  |
| H3K36me3        | 0.32   | NA                   | 0.42  |
| H3K27me3        | 0.0069 | 0.90                 | 0.52  |
| H3K4me1         | 0.61   | 0.42                 | 0.25  |
| H3K4me3         | 0.67   | 0.22                 | 0.40  |
| H3K9ac          | NA     | NA                   | NA    |
| H3K36me3        | 0.27   | 0.23                 | 0.21  |
| H3K27me3        | 0.93   | 0.99                 | 0.53  |
| H3K4me1         | 0.61   | 0.66                 | 0.65  |
| H3K4me3         | NA     | 0.0063               | 0.16  |
| H3K9ac          | 0.015  | 0.87                 | 0.89  |
| H3K36me3        | 0.49   | NA                   | NA    |
| H3K27me3        | 0.68   | 0.37                 | 0.38  |
| H3K4me1         | 0.61   | NA                   | NA    |
| H3K4me3         | 0.024  | 0.95                 | 0.13  |
| H3K9ac          | 0.43   | NA                   | 0.94  |
| H3K36me3        | 0.012  | 0.049                | 0.41  |
| H3K27me3        | 0.60   | 0.99                 | 0.84  |
| H3K4me1         | 0.26   | NA                   | NA    |
| H3K4me3         | 0.83   | 0.77                 | 0.74  |
| H3K9ac          | 0.91   | 0.99                 | 0.63  |
| H3K36me3        | NA     | NA                   | 0.08  |
| H3K27me3        | 0.37   | 0.92                 | 0.73  |
| H3K4me1         | 0.52   | 0.34                 | 0.68  |
| H3K4me3         | 0.011  | NA                   | 0.21  |
| H3K9ac          | 0.82   | NA                   | 0.77  |
| H3K36me3        | 0.73   | 0.10                 | 0.29  |
| H3K27me3        | 0.81   | NA                   | 0.94  |
| H3K4me1         | NA     | NA                   | 0.08  |
| H3K4me3         | 0.48   | 0.34                 | 0.31  |
| H3K9ac          | 0.72   | NA                   | 0.34  |
| H3K36me3        | 0.63   | 0.26                 | 0.65  |
| H3K27me3        | 0.047  | NA                   | 0.10  |
| H3K4me1         |        |                      |       |
| H3K4me3         |        |                      |       |
| H3K9ac          |        |                      |       |
| H3K36me3        |        |                      |       |
| H3K27me3        |        |                      |       |
| H3K4me1         |        |                      |       |
| H3K4me3         |        |                      |       |
| H3K9ac          |        |                      |       |
| H3K36me3        |        |                      |       |
| H3K27me3        |        |                      |       |
| H3K4me1         |        |                      |       |
| H3K4me3         |        |                      |       |
| H3K9ac          |        |                      |       |
| H3K36me3        |        |                      |       |
| H3K27me3        |        |                      |       |
| H3K4me1         |        |                      |       |
| H3K4me3         |        |                      |       |
| H3K9ac          |        |                      |       |
| H3K36me3        |        |                      |       |
| H3K27me3        |        |                      |       |
| H3K4me1         |        |                      |       |
| H3K4me3         |        |                      |       |
| H3K9ac          |        |                      |       |
| H3K36me3        |        |                      |       |
| H3K27me3        |        |                      |       |
| H3K4me1         |        |                      |       |
| H3K4me3         |        |                      |       |
| H3K9ac          |        |                      |       |
| H3K36me3        |        |                      |       |
| H3K27me3        |        |                      |       |
| H3K4me1         |        |                      |       |
| H3K4me3         |        |                      |       |
| H3K9ac          |        |                      |       |
| H3K36me3        |        |                      |       |
| H3K27me3        |        |                      |       |
| H3K4me1         |        |                      |       |
| H3K4me3         |        |                      |       |
| H3K9ac          |        |                      |       |
| H3K36me3        |        |                      |       |
| H3K27me3        |        |                      |       |
| H3K4me1         |        |                      |       |
| H3K4me3         |        |                      |       |
| H3K9ac          |        |                      |       |
| H3K36me3        |        |                      |       |
| H3K27me3        |        |                      |       |
| H3K4me1         |        |                      |       |
| H3K4me3         |        |                      |       |
| H3K9ac          |        |                      |       |
| H3K36me3        |        |                      |       |
| H3K27me3        |        |                      |       |
| H3K4me1         |        |                      |       |
| H3K4me3         |        |                      |       |
| H3K9ac          |        |                      |       |
| H3K36me3        |        |                      |       |
| H3K27me3        |        |                      |       |
| H3K4me1         |        |                      |       |
| H3K4me3         |        |                      |       |
| H3K9ac          |        |                      |       |
| H3K36me3        |        |                      |       |
| H3K27me3        |        |                      |       |
| H3K4me1         |        |                      |       |
| H3K4me3         |        |                      |       |
| H3K9ac          |        |                      |       |
| H3K36me3        |        |                      |       |
| H3K27me3        |        |                      |       |
| H3K4me1         |        |                      |       |
| H3K4me3         |        |                      |       |
| H3K9ac          |        |                      |       |
| H3K36me3        |        |                      |       |
| H3K27me3        |        |                      |       |
| H3K4me1         |        |                      |       |
| H3K4me3         |        |                      |       |
| H3K9ac          |        |                      |       |
| H3K36me3        |        |                      |       |
| H3K27me3        |        |                      |       |
| H3K4me1         |        |                      |       |
| H3K4me3         |        |                      |       |
| H3K9ac          |        |                      |       |
| H3K36me3        |        |                      |       |
| H3K27me3        |        |                      |       |
| H3K4me1         |        |                      |       |
| H3K4me3         |        |                      |       |
| H3K9ac          |        |                      |       |
| H3K36me3        |        |                      |       |
| H3K27me3        |        |                      |       |
| H3K4me1         |        |                      |       |
| H3K4me3         |        |                      |       |
| H3K9ac          |        |                      |       |
| H3K36me3        |        |                      |       |
| H3K27me3        |        |                      |       |
| H3K4me1         |        |                      |       |
| H3K4me3         |        |                      |       |
| H3K9ac          |        |                      |       |
| H3K36me3        |        |                      |       |
| H3K27me3        |        |                      |       |
| H3K4me1         |        |                      |       |
| H3K4me3         |        |                      |       |
| H3K9ac          |        |                      |       |
| H3K36me3        |        |                      |       |
| H3K27me3        |        |                      |       |
| H3K4me1         |        |                      |       |
| H3K4me3         |        |                      |       |
| H3K9ac          |        |                      |       |
| H3K36me3        |        |                      |       |
| H3K27me3        |        |                      |       |
| H3K4me1         |        |                      |       |
| H3K4me3         |        |                      |       |
| H3K9ac          |        |                      |       |
| H3K36me3        |        |                      |       |
| H3K27me3        |        |                      |       |
| H3K4me1         |        |                      |       |
| H3K4me3         |        |                      |       |
| H3K9ac          |        |                      |       |
| H3K36me3        |        |                      |       |
| H3K27me3        |        |                      |       |
| H3K4me1         |        |                      |       |
| H3K4me3         |        |                      |       |
| H3K9ac          |        |                      |       |
| H3K36me3        |        |                      |       |
| H3K27me3        |        |                      |       |
| H3K4me1         |        |                      |       |
| H3K4me3         |        |                      |       |
| H3K9ac          |        |                      |       |
| H3K36me3        |        |                      |       |
| H3K27me3        |        |                      |       |
| H3K4me1         |        |                      |       |
| H3K4me3         |        |                      |       |
| H3K9ac          |        |                      |       |
| H3K36me3        |        |                      |       |
| H3K27me3        |        |                      |       |
| H3K4me1         |        |                      |       |
| H3K4me3         |        |                      |       |
| H3K9ac          |        |                      |       |
| H3K36me3        |        |                      |       |
| H3K27me3        |        |                      |       |
| H3K4me1         |        |                      |       |
| H3K4me3         |        |                      |       |
| H3K9ac          |        |                      |       |
| H3K36me3        |        |                      |       |
| H3K27me3        |        |                      |       |
| H3K4me1         |        |                      |       |
| H3K4me3         |        |                      |       |
| H3K9ac          |        |                      |       |
| H3K36me3        |        |                      |       |
| H3K27me3        |        |                      |       |
| H3K4me1         |        |                      |       |
| H3K4me3         |        |                      |       |
| H3K9ac          |        |                      |       |
| H3K36me3        |        |                      |       |
| H3K27me3        |        |                      |       |
| H3K4me1         |        |                      |       |
| H3K4me3         |        |                      |       |
| H3K9ac          |        |                      |       |
| H3K36me3        |        |                      |       |
| H3K27me3        |        |                      |       |
| H3K4me1         |        |                      |       |
| H3K4me3         |        |                      |       |
| H3K9ac          |        |                      |       |
| H3K36me3        |        |                      |       |
| H3K27me3        |        |                      |       |
| H3K4me1         |        |                      |       |
| H3K4me3         |        |                      |       |
| H3K9ac          |        |                      |       |
| H3K36me3        |        |                      |       |
| H3K27me3        |        |                      |       |
| H3K4me1         |        |                      |       |
| H3K4me3         |        |                      |       |
| H3K9ac          |        |                      |       |
| H3K36me3        |        |                      |       |
| H3K27me3        |        |                      |       |
| H3K4me1         |        |                      |       |
| H3K4me3         |        |                      |       |
| H3K9ac          |        |                      |       |
| H3K36me3        |        |                      |       |
| H3K27me3        |        |                      |       |
| H3K4me1         |        |                      |       |
| H3K4me3         |        |                      |       |
| H3K9ac          |        |                      |       |
| H3K36me3        |        |                      |       |
| H3K27me3        |        |                      |       |
| H3K4me1         |        |                      |       |
| H3K4me3         |        |                      |       |
| H3K9ac          |        |                      |       |
| H3K36me3        |        |                      |       |
| H3K27me3        |        |                      |       |
| H3K4me1         |        |                      |       |
| H3K4me3         |        |                      |       |
| H3K9ac          |        |                      |       |
| H3K36me3        |        |                      |       |
| H3K27me3        |        |                      |       |
| H3K4me1         |        |                      |       |
| H3K4me3         |        |                      |       |
| H3K9ac          |        |                      |       |
| H3K36me3        |        |                      |       |
| H3K27me3        |        |                      |       |
| H3K4me1         |        |                      |       |
| H3K4me3         |        |                      |       |
| H3K9ac          |        |                      |       |
| H3K36me3        |        |                      |       |
| H3K27me3        |        |                      |       |
| H3K4me1         |        |                      |       |
| H3K4me3         |        |                      |       |
| H3K9ac          |        |                      |       |
| H3K36me3        |        |                      |       |
| H3K27me3        |        |                      |       |
| H3K4me1         |        |                      |       |
| H3K4me3         |        |                      |       |
| H3K9ac          |        |                      |       |
| H3K36me3        |        |                      |       |
| H3K27me3        |        |                      |       |
| H3K4me1         |        |                      |       |
| H3K4me3         |        |                      |       |
| H3K9ac          |        |                      |       |
| H3K36me3        |        |                      |       |
| H3K27me3        |        |                      |       |
| H3K4me1         |        |                      |       |
| H3K4me3         |        |                      |       |
| H3K9ac          |        |                      |       |
| H3K36me3        |        |                      |       |
| H3K27me3        |        |                      |       |
| H3K4me1         |        |                      |       |
| H3K4me3         |        |                      |       |
| H3K9ac          |        |                      |       |
| H3K36me3        |        |                      |       |
| H3K27me3        |        |                      |       |
| H3K4me1         |        |                      |       |
| H3K4me3         |        |                      |       |
| H3K9ac          |        |                      |       |
| H3K36me3        |        |                      |       |
| H3K27me3        |        |                      |       |
| H3K4me1         |        |                      |       |
| H3K4me3         |        |                      |       |
| H3K9ac          |        |                      |       |
| H3K36me3        |        |                      |       |
| H3K27me3        |        |                      |       |
| H3K4me1         |        |                      |       |
| H3K4me3         |        |                      |       |
| H3K9ac          |        |                      |       |
| H3K36me3        |        |                      |       |
| H3K27me3        |        |                      |       |
| H3K4me1         |        |                      |       |
| H3K4me3         |        |                      |       |
| H3K9ac          |        |                      |       |
| H3K36me3        |        |                      |       |
| H3K27me3        |        |                      |       |
| H3K4me1         |        |                      |       |
| H3K4me3         |        |                      |       |
| H3K9ac          |        |                      |       |
| H3K36me3        |        |                      |       |
| H3K27me3        |        |                      |       |
| H3K4me1         |        |                      |       |
| H3K4me3         |        |                      |       |
| H3K9ac          |        |                      |       |
| H3K36me3        |        |                      |       |
| H3K27me3        |        |                      |       |
| H3K4me1         |        |                      |       |
| H3K4me3         |        |                      |       |
| H3K9ac          |        |                      |       |
| H3K36me3        |        |                      |       |
| H3K27me3        |        |                      |       |
| H3K4me1         |        |                      |       |
| H3K4me3         |        |                      |       |
| H3K9ac          |        |                      |       |
| H3K36me3        |        |                      |       |
| H3K27me3        |        |                      |       |
| H3K4me1         |        |                      |       |
| H3K4me3         |        |                      |       |
| H3K9ac          |        |                      |       |
| H3K36me3        |        |                      |       |
| H3K27me3        |        |                      |       |
| H3K4me1         |        |                      |       |
| H3K4me3         |        |                      |       |
| H3K9ac          |        |                      |       |
| H3K36me3        |        |                      |       |
| H3K27me3        |        |                      |       |
| H3K4me1         |        |                      |       |
| H3K4me3         |        |                      |       |
| H3K9ac          |        |                      |       |
| H3K36me3        |        |                      |       |
| H3K27me3        |        |                      |       |
| H3K4me1         |        |                      |       |
| H3K4me3         |        |                      |       |
| H3K9ac          |        |                      |       |
| H3K36me3        |        |                      |       |
| H3K27me3        |        |                      |       |
| H3K4me1         |        |                      |       |
| H3K4me3         |        |                      |       |
| H3K9ac          |        |                      |       |
| H3K36me3        |        |                      |       |
| H3K27me3        |        |                      |       |
| H3K4me1         |        |                      |       |
| H3K4me3         |        |                      |       |
| H3K9ac          |        |                      |       |
| H3K36me3        |        |                      |       |
| H3K27me3        |        |                      |       |
| H3K4me1         |        |                      |       |
| H3K4me3         |        |                      |       |
| H3K9ac          |        |                      |       |
| H3K36me3        |        |                      |       |
| H3K27me3        |        |                      |       |
| H3K4me1         |        |                      |       |
| H3K4me3         |        |                      |       |
| H3K9ac          |        |                      |       |
| H3K36me3        |        |                      |       |
| H3K27me3        |        |                      |       |
| H3K4me1         |        |                      |       |
| H3K4me3         |        |                      |       |
| H3K9ac          |        |                      |       |
| H3K36me3        |        |                      |       |
| H3K27me3        |        |                      |       |
| H3K4me1         |        |                      |       |
| H3K4me3         |        |                      |       |
| H3K9ac          |        |                      |       |
| H3K36me3        |        |                      |       |
| H3K27me3        |        |                      |       |
| H3K4me1         |        |                      |       |
| H3K4me3         |        |                      |       |
| H               |        |                      |       |
